# Supplementary material
Source: publisher site journal article supplement (https://cdn.bio-protocol.org/journal/static/4972_Supplementary%20information.docx)
Supplement: Supplementary file 1 [file 4972_Supplementary%20information.docx]

# Supplementary information

1. **Rapid expansion protocol**


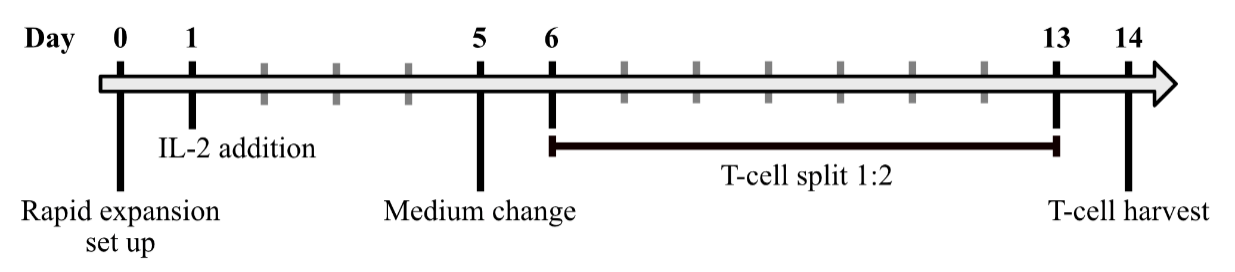


**Figure S1. Rapid expansion timeline**

1. Day 0: Start ex vivo expansion cultures by seeding 105 T cells per T25 tissue culture flask (upright position) in 20 mL of T-cell expansion medium with a total of 3 × 107 irradiated (40 Gy) PBMCs from three donors (107 cells of each) as feeder cells.
   - For initial expansion, set up one T25 tissue culture flask. If the T-cell line expands well, resulting in at least 15 × 106 (up to 107) T cells per setup, test batch for CD8+/CD4+ ratio and TCR transfection efficiency.
   - For preparation of larger batches of validated T-cell lines, set up multiple T25 tissue culture flasks with 105 T cells each. Take into account that well-growing T-cell lines need to be split 1:2 two to three times a week. Setting up 10 flasks will thus result in the harvest of 40–80 T25 flasks (containing 6 × 108–8 × 109 cells in total).
2. Day 1: Carefully add 5 mL of T-cell expansion medium containing 1500 IU/mL of IL-2 to each T25 tissue culture flask without disturbing the cell layer at the bottom of the flask.
3. Day 5: Replace 12.5 mL of the medium of each flask with 12.5 mL of fresh T-cell expansion medium containing 1200 IU/mL of IL-2 without disturbing the cell layer at the bottom of the flask.
4. Day 6–13: Split the cells 1:2 when they start forming dense clusters. Resuspend cells thoroughly to disperse the cells of the clusters.
5. Day 14: Harvest cells and cryopreserve them in aliquots of 5 × 107 cells per 500 µL of freezing medium.
6. **Estimation of required T-cell number**


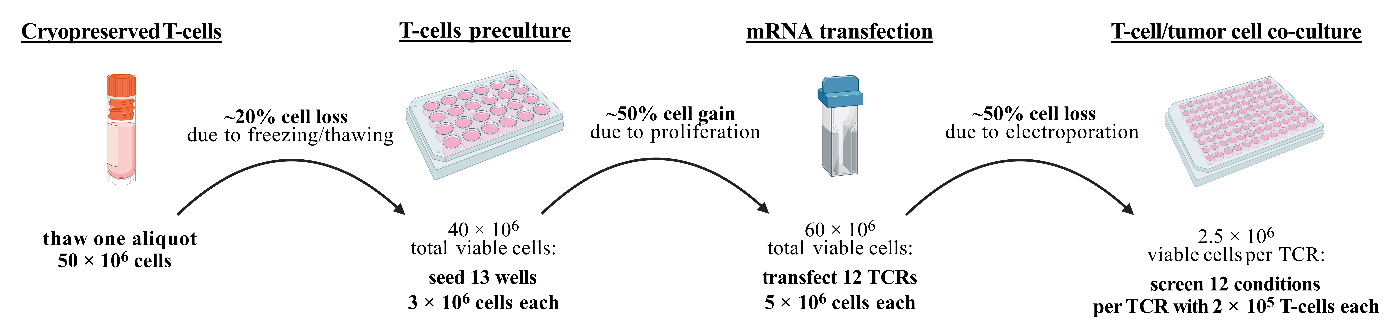


**Figure S2. Graphical overview of T-cell number development throughout activation assay.** This is an example of the typical T-cell number gain/loss during the steps of the procedure described in **B**. Estimate the number of T cells that need to be thawed for T-cell preculture (first step, left), based on the number of conditions to screen per TCR (last step, right), taking into account the cell gain/loss typically observed for the T-cell line concerned (figure created with BioRender.com).

1. **Gating strategy during flow cytometry analysis**

**
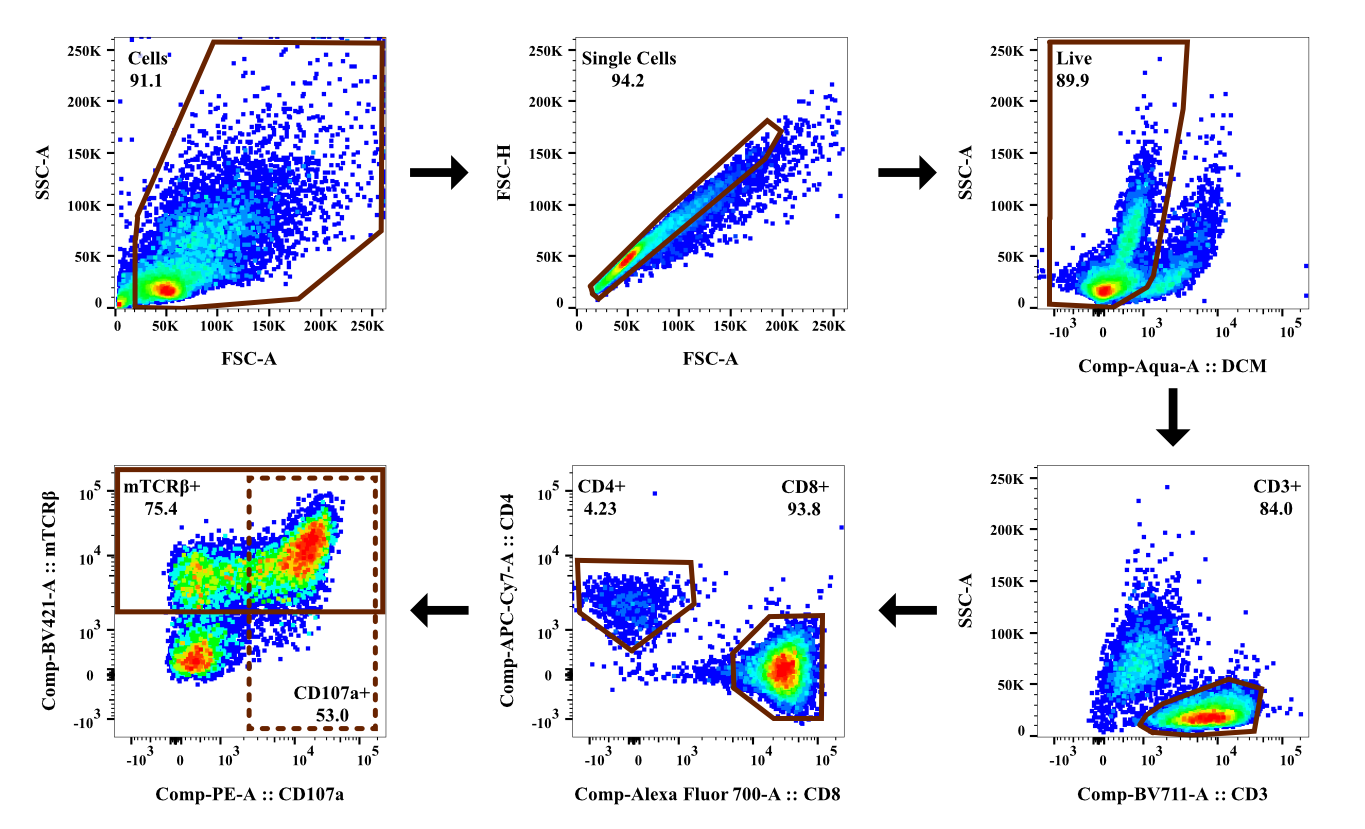
**

**Figure S3. General gating strategy.** Clockwise: Exclusion of debris and selection of single cells based on forward/sideward scatter (FSC, SSC), exclusion of dead cell marker (DCM)-positive cells, selection of CD3+ T cells, selection of coreceptor expressing T cells, analysis of mTCRβ and CD107a expression of coreceptor-positive T cells (here CD8+).

1. **Coculture of TCR-transduced T cells with non-adherent/adherent tumor cells**

TCR-mediated anti-tumor reactivity can also be detected if the coculture is set up with non-adherent tumor cells or with freshly trypsinized tumor cells without prior pre-adherence of the tumor cells. However, this is likely to reduce the sensitivity of the assay; the reason being that a lower fraction of T cells will be able to effectively engage with target/tumor cells within the 5 h timespan. As shown in Figure S4, the likelihood for effective T-cell/target engagement is increased by tumor cell pre-adherence, probably due to the larger surface area of adhered tumor cells, as illustrated by the fact that greater tumor cell confluency also increases the fraction of reactive T cells.

Based on initial experimentation and the fact that most cytolytic CD8+ T-cell assays feature an excess of effector T cells over target cells, we set the default effector to target (E:T) ratio at 4:1. With respect to assays using non-adherent or freshly trypsinized target/tumor cells, we have observed that reducing the E:T ratio and/or even adding an excess of tumor cells can increase the fraction of responding T cells (Figure S4A–B). This may especially be important for detecting weak TCR–target interactions such as involving conditions of limiting antigen presentation (e.g., in the case of the melanoma tumor cell Colo800; Figure S4B) that are commonly encountered in tumor immunology research. A limitation in this respect is that, in order to avoid overcrowding of the wells, reversing E:T ratios in favor of the target cells involves reduction of T-cell numbers, which can affect the reproducibility of the assay.


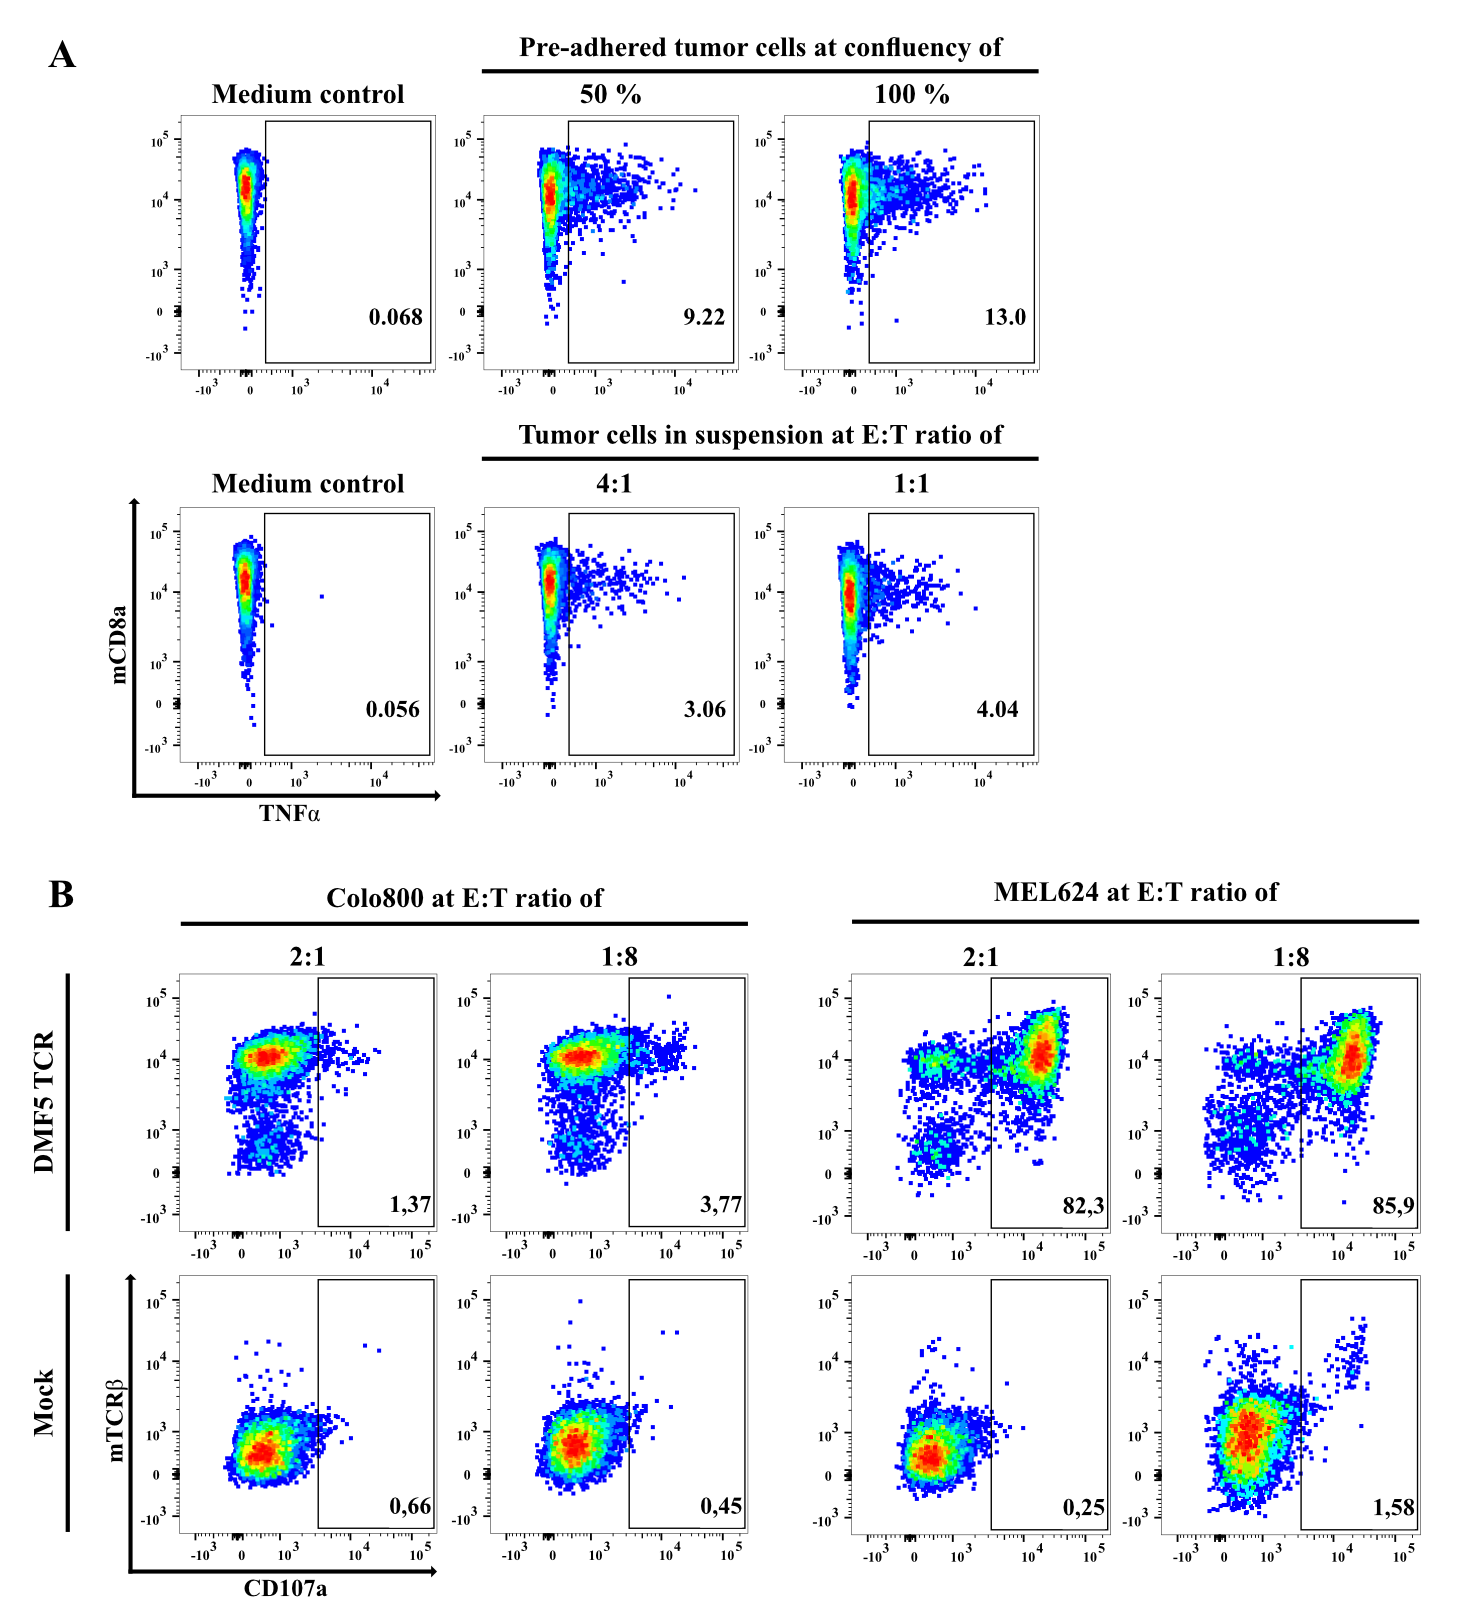


**Figure S4. Influence of tumor cell adherence and E:T ratio on the sensitivity of TCR function detection in 5 h T-cell/tumor cell coculture assays.** **(A)** Comparison of reactivity of T222 T cells co-transfected with mouse CD8 and the mouse tumor-reactive TCR as described in Figure 7 against autologous mouse tumor cells under adherent (top) and non-adherent (bottom) conditions. Data show that the fraction of responding T cells is higher in the context of pre-adhered tumor cells and that the fraction of responding T cells in the non-adhered setting can be increased by applying lower E:T ratios. **(B)** Reactivity of CD8+ T222 T cells transfected with the MART-1-specific DMF5 TCR against melanoma cells expressing respectively low (Colo800) and high (Mel624) levels of MART-1 T-cell epitope. This experiment further illustrates that application of a lower E:T ratio can increase the fraction of reactive T cells, and that this may especially facilitate the detection of TCR reactivity at conditions of limited antigen presentation (Colo800).
